# Supplementary material for: Aromatic Sulfonamides including a Sulfonic Acid Tail: New Membrane Impermeant Carbonic Anhydrase Inhibitors for Targeting Selectively the Cancer-Associated Isoforms
Source: MDPI journal article supplement (doi:10.3390/ijms23010461), 2021-12-31
Supplement: s1 [file s1]

## Supporting information

### Aromatic sulfonamides including a sulfonic acid tail: new membrane impermeant carbonic anhydrase inhibitors for targeting selectively the cancer-associated isoforms.

Simone Giovannuzzi <sup>1</sup>, Mario D'Ambrosio <sup>2</sup>, Cristina Luceri <sup>2</sup>, Marco Pallecchi <sup>1</sup>, Gianluca Bartolucci <sup>1</sup>, Alessio Nocentini <sup>1\*</sup> and Claudiu T. Supuran <sup>1</sup>

<sup>1</sup> Department of NEUROFARBA, Section of Pharmaceutical and Nutraceutical Sciences, University of Florence, Polo Scientifico, Via U. Schiff 6, 50019 Sesto Fiorentino, Firenze, Italy.

<sup>2</sup> University of Florence, Department of NEUROFARBA, Section of Pharmacology and Toxicology, Viale Gaetano Pieraccini 6, 50100, Florence, Italy.

**Table S1.** MS/MS parameters

| Compound  | Precursor ion<br>(m/z) | Quantifier ion<br>(m/z) [EV (V)] |
|-----------|------------------------|----------------------------------|
| <b>33</b> | 402                    | 280 [1,0]                        |
| <b>34</b> | 417                    | 219 [1,0]                        |
| <b>38</b> | 509                    | 311 [1,0]                        |
| <b>39</b> | 432                    | 367 [1,0]                        |
| <b>41</b> | 359                    | 223 [0,8]                        |
| <b>43</b> | 388                    | 252 [1,2]                        |

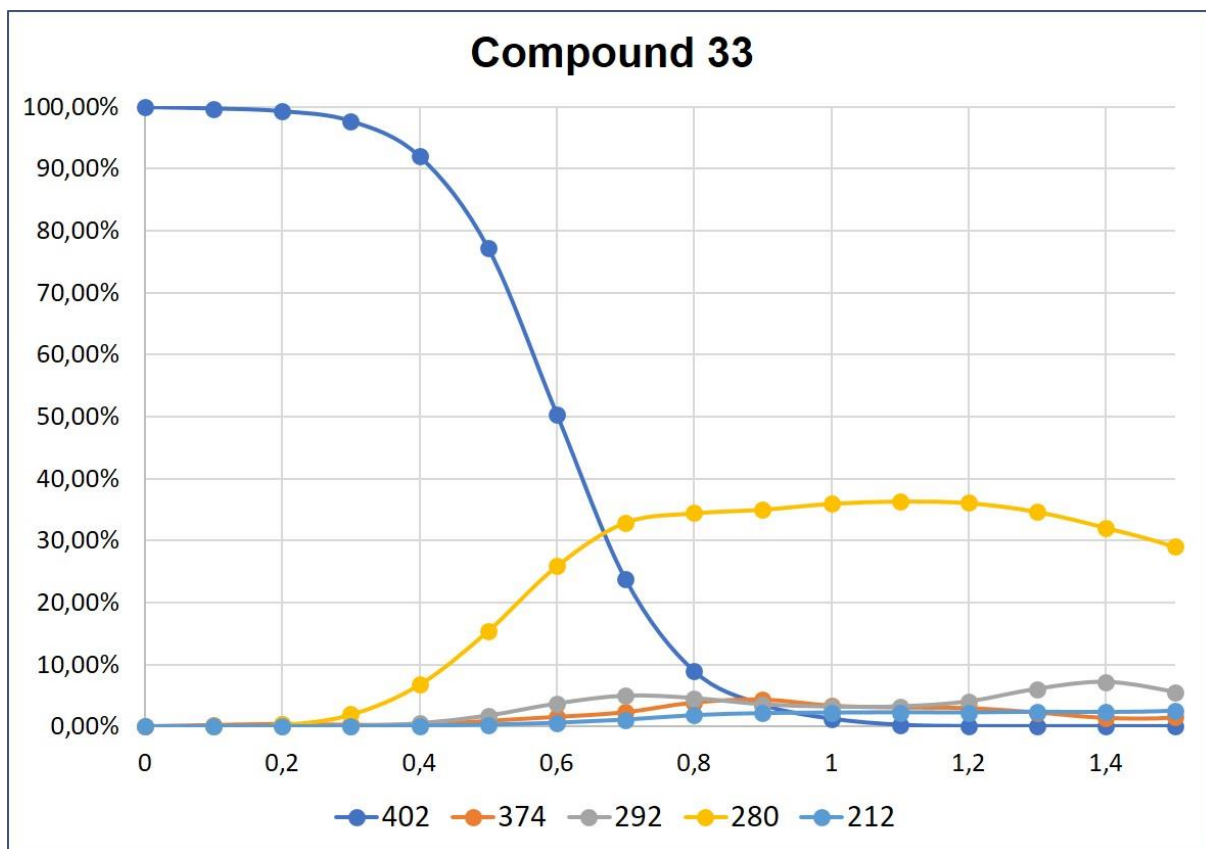

**Figure S1.** Breakdown curves of compound 33.

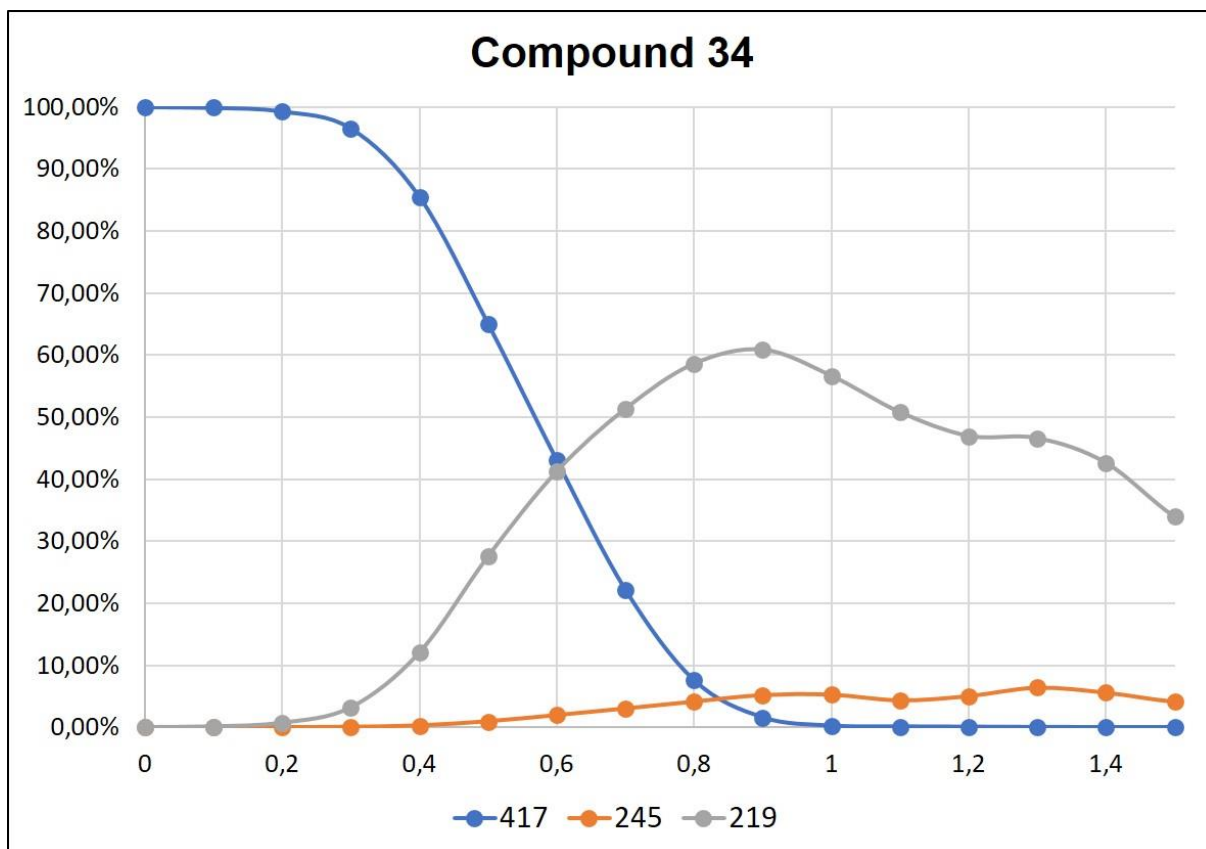

**Figure S2.** Breakdown curves of compound 34.

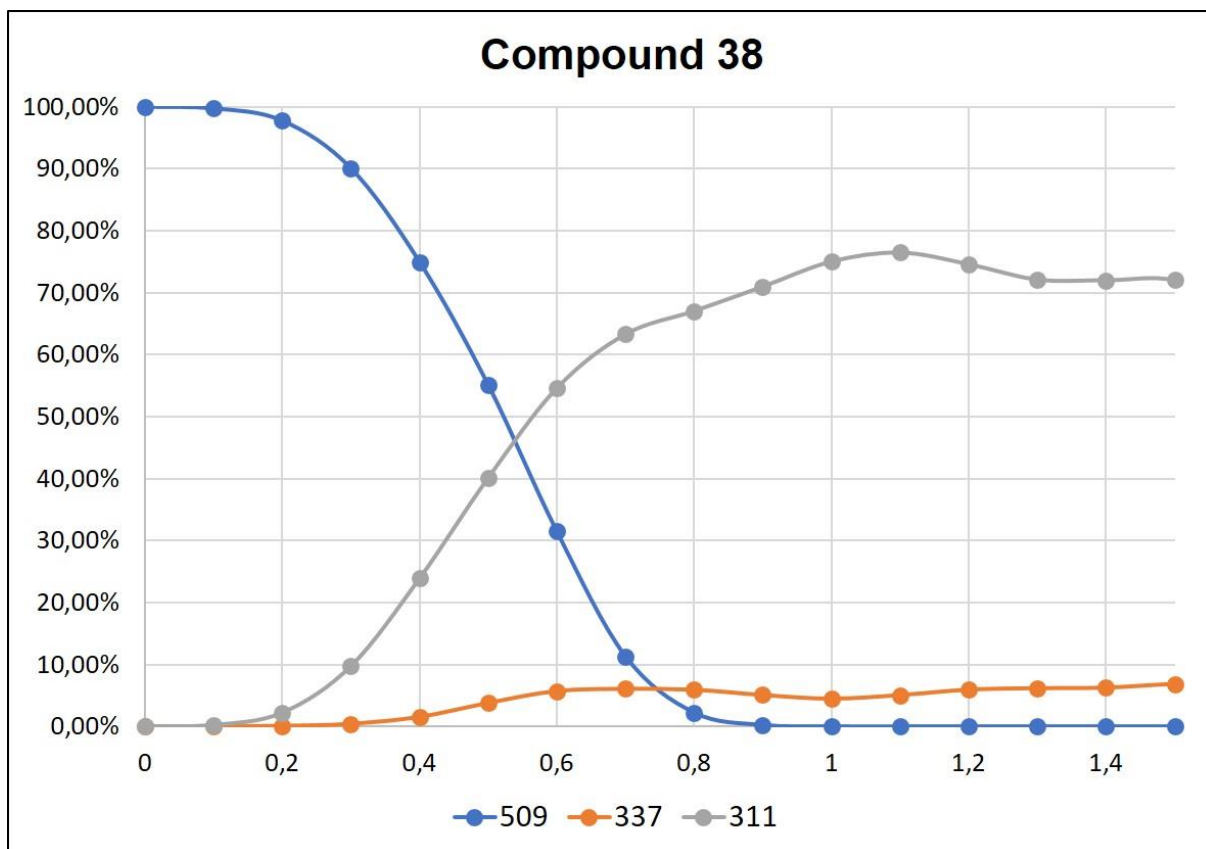

**Figure S3.** Breakdown curves of compound 38.

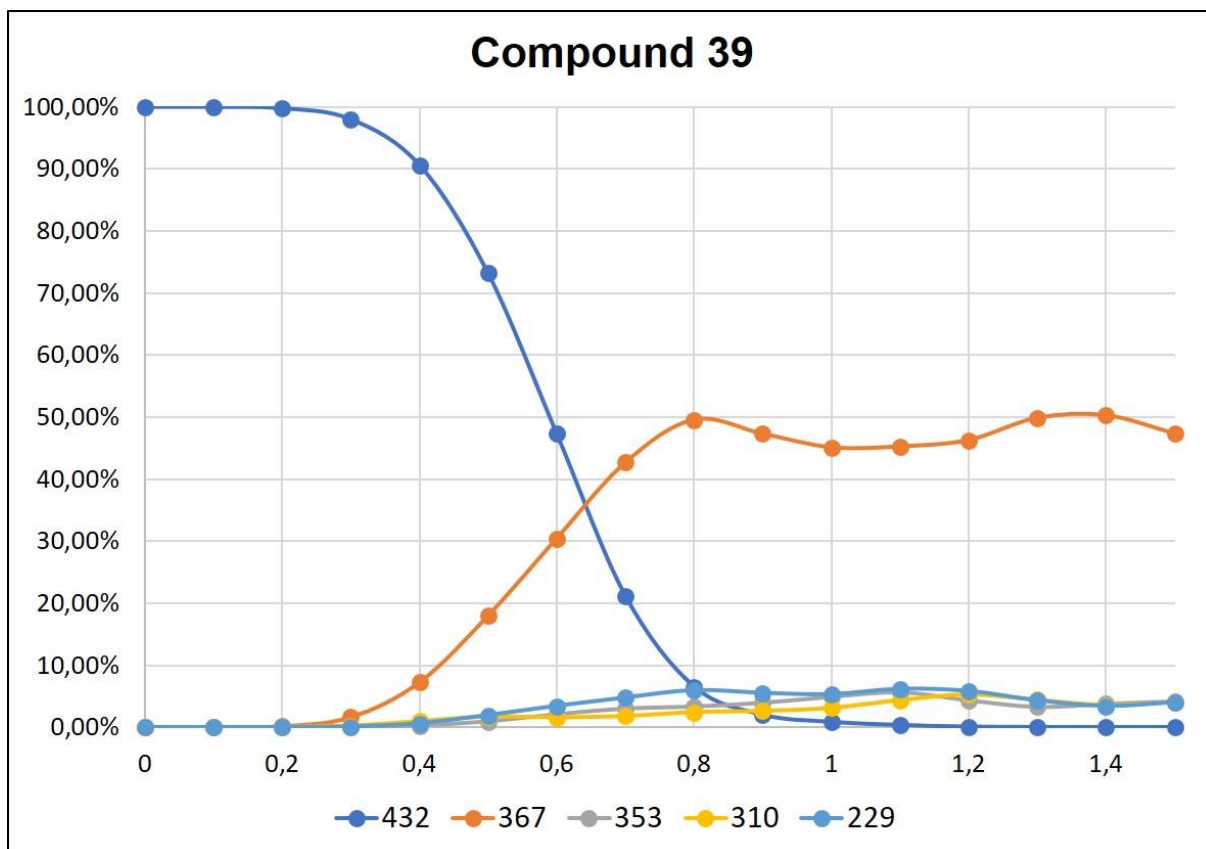

**Figure S4.** Breakdown curves of compound 39.

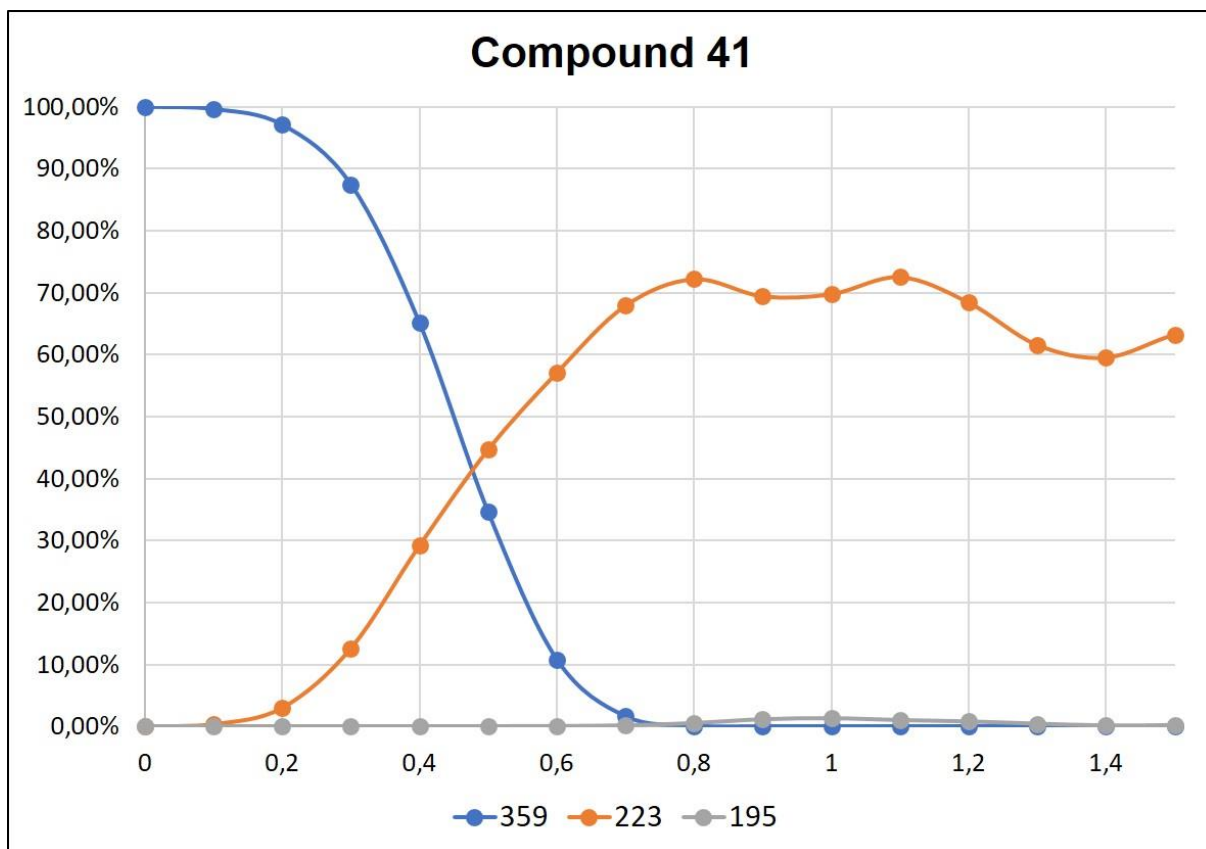

**Figure S5.** Breakdown curves of compound 41.

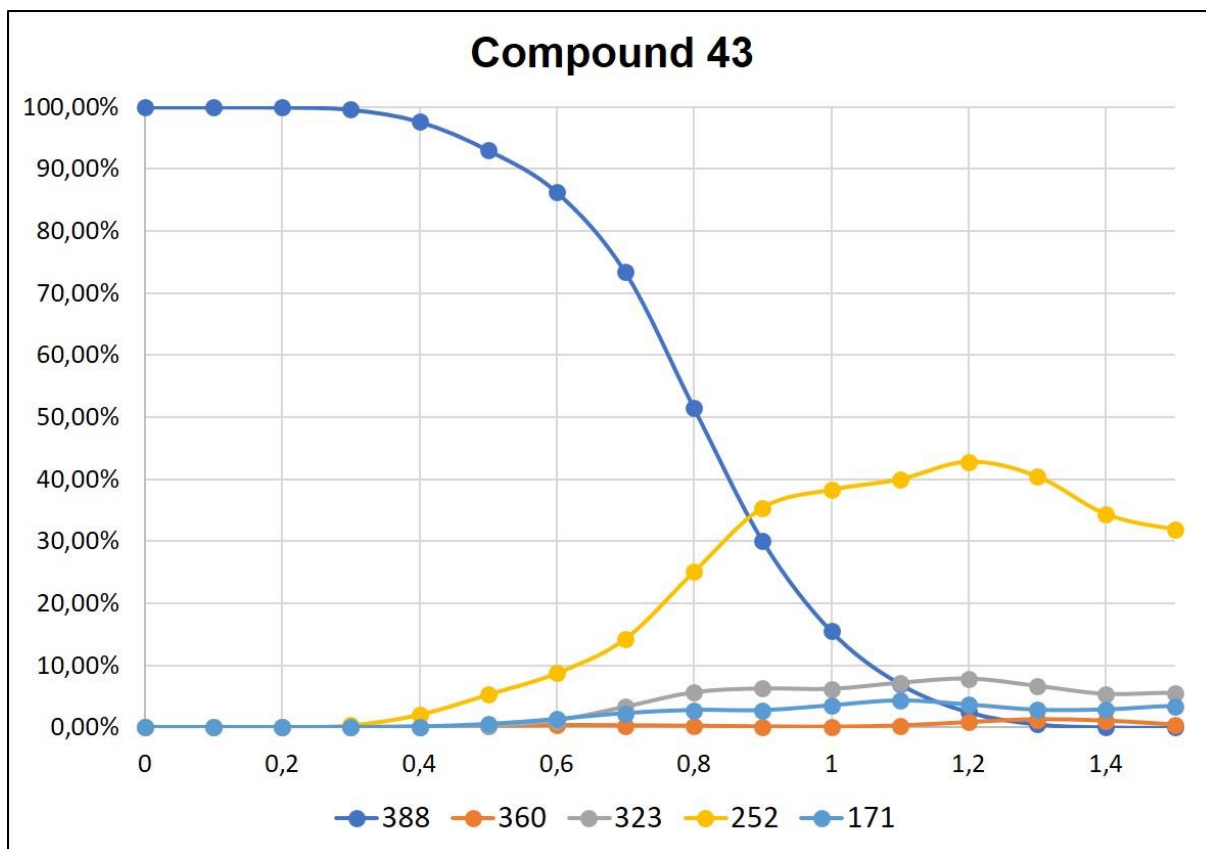

**Figure S6.** Breakdown curves of compound 43.
